# Supplementary material
Source: PubMed Central journal article supplement (PMC3166659)
Supplement: NIHMS181192-supplement-03.pdf [file NIHMS181192-supplement-03.pdf]

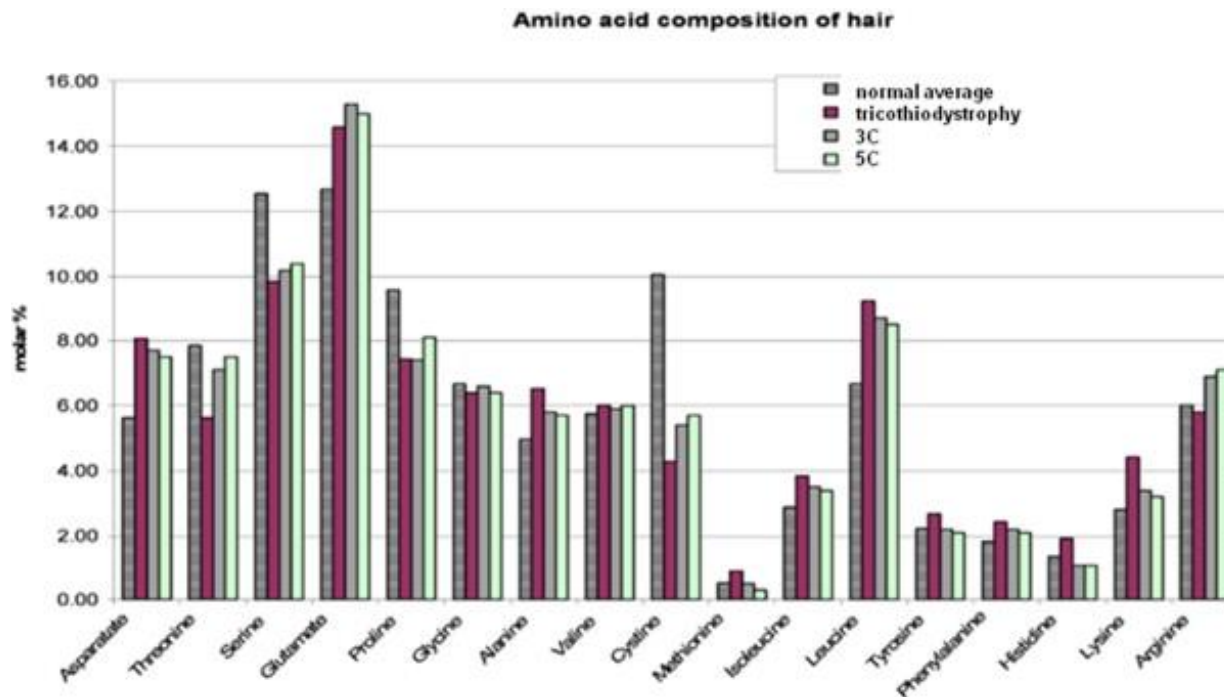

Supplementary Figure 1 The amino acid composition of hair from 2 of the patients with THES shows a remarkable similarity to the amino acid composition of hair from children with trichothiodystrophy.

Jane Louise Hartley , Nicholas C. Zachos , Ban Dawood , Mark Donowitz , Julia Forman , Rodney J. Pollitt , Neil V....

### **Mutations in *TTC37* Cause Trichohepatoenteric Syndrome (Phenotypic Diarrhea of Infancy)**

Gastroenterology, Volume 138, Issue 7, 2010, 2388 - 2398.e2

<http://dx.doi.org/10.1053/j.gastro.2010.02.010>
